# Supplementary material for: HLA-DR expression in tumor epithelium is an independent prognostic indicator in esophageal adenocarcinoma patients
Source: Springer Nature journal article supplement (doi:10.1007/s00262-017-1983-1), 2017-03-18
Supplement: MOESM1 [file 12153254]

**Supplementary table 1 Demographic data for survival analysis**

|                                           |              |
|-------------------------------------------|--------------|
| Male/Female                               | 59/11        |
| Median age at diagnosis (range)           | 68 (38-84)   |
| Clinical stage of disease                 |              |
| Stage 0                                   | 1            |
| Stage 1                                   | 10           |
| Stage 2                                   | 31           |
| Stage 3                                   | 19           |
| Stage 4                                   | 1            |
| Unknown                                   | 8            |
| Pathological stage of disease             |              |
| Stage 1                                   | 12           |
| Stage 2                                   | 20           |
| Stage 3                                   | 33           |
| Stage 4                                   | 4            |
| Unknown                                   | 1            |
| Median overall survival in months (range) | 28.5 (3-148) |
| Known history of BE                       | 35           |

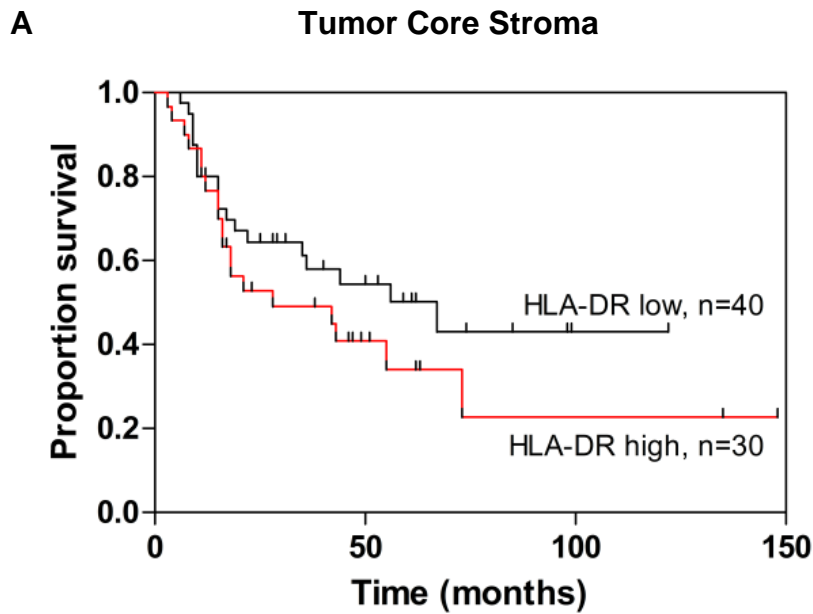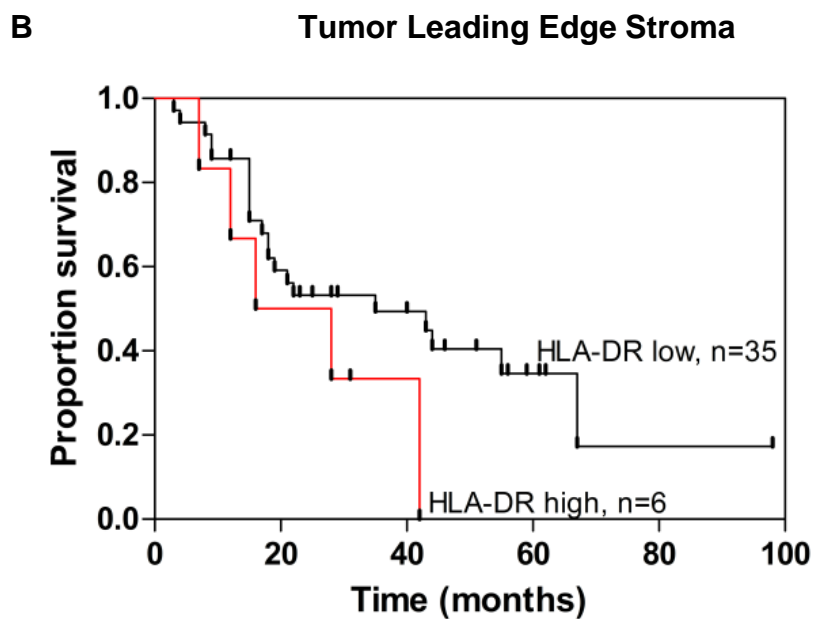

**Supplementary figure 1 HLA-DR expression level does not predict survival outcome when measured in the EAC tumor stroma**

No significant difference was observed in the risk of mortality between patients with low (<50%) HLA-DR expression compared to those with high ( $\geq$ 50%) expression in the EAC tumor stroma, either in the tumour core (A) or leading edge (B).

Associations were tested using a Mantel-Cox log-rank test.

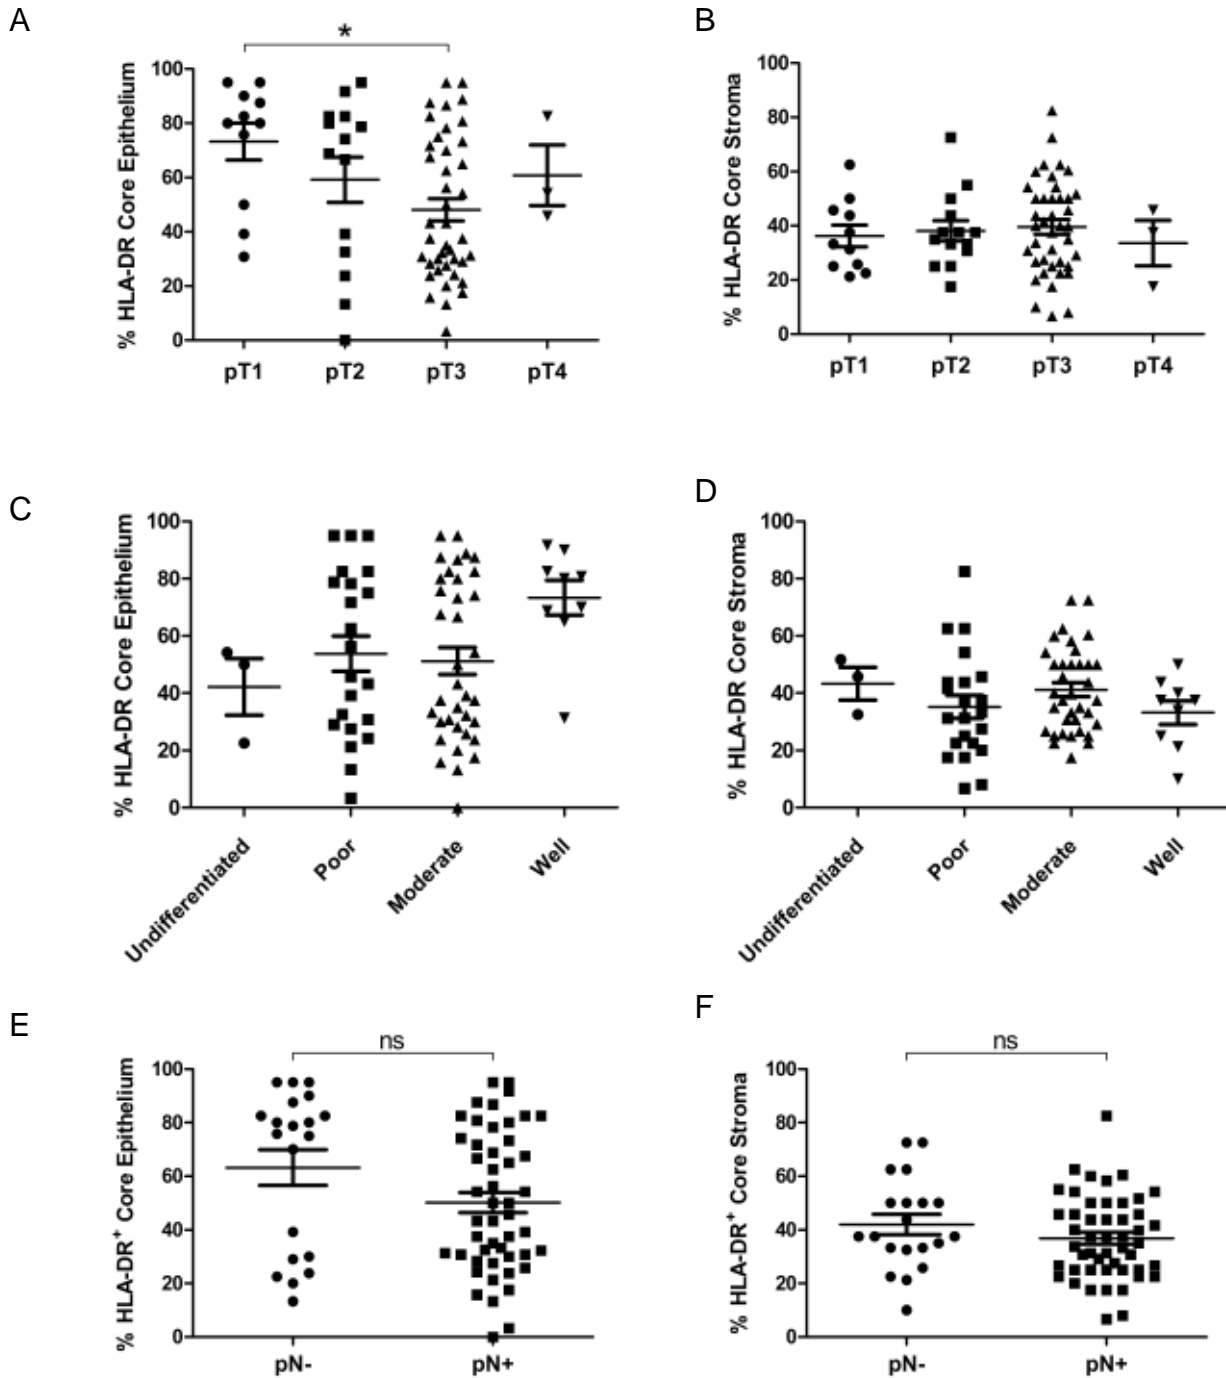

### Supplementary figure 2 Pathological correlates with HLA-DR

HLA-DR levels overall did not change significantly with changes in pathological T stage (A, B), tumor differentiation status (C, D) or lymph node involvement (E, F), in either tumor epithelium or stroma, respectively. Similar results were seen for EAC leading edge tissue. pT = pathological T stage, pN = pathological lymph node positivity. Associations were tested by *t* test or Kruskal-Wallis and Dunn's Multiple Comparisons tests, as appropriate, \*  $p < 0.05$ .
